# Supplementary material for: Stepwise post-synthetic linker installation in rare-earth metal–organic frameworks
Source: Royal Society of Chemistry journal article supplement (doi:10.1039/d3tc04365g), 2024-01-01
Supplement: d3tc04365g1.pdf [file d3tc04365g1.pdf]

Electronic Supporting Information (ESI) for

**Stepwise post-synthetic linker installation in rare-earth metal-  
organic frameworks**

Yuchen Hu,<sup>a</sup> Rebecca Shu Hui Khoo,<sup>b</sup> Aiying Pang,<sup>\*c</sup> Sizhuo Yang,<sup>b</sup> Christian Fiankor,<sup>a</sup> Xu Zhang<sup>\*c</sup> and Jian Zhang<sup>\*b</sup>

<sup>a</sup>Department of Chemistry, University of Nebraska-Lincoln, Lincoln, Nebraska 68588 United States

<sup>b</sup>The Molecular Foundry, Lawrence Berkeley National Laboratory, Berkeley, California 94720 United States. E-mail: jianzhang@lbl.gov

<sup>c</sup>School of Chemistry and Chemical Engineering, Huaiyin Normal University, Jiangsu Engineering Laboratory for Environment Functional Materials, Jiangsu Collaborative Innovation Center of Regional Modern Agriculture & Environmental Protection, No.111 West Changjiang Road, Huaian, Jiangsu 223300 China. E-mail: ayp@hytc.edu.cn, zhangxu@hytc.edu.cn

## S-1 Synthesis of Primary Ligand and Secondary Linker CzTPDC

Tetratopic ligand **H<sub>4</sub>L** was synthesized via the typical Suzuki couplings followed by saponification in a basic aqueous solution. Detailed synthesis procedure of **H<sub>4</sub>L** has been reported in the literature.<sup>1</sup> Ditopic secondary linker **CzDC** was purchased and used without purification.

### Synthesis of CzTPDC

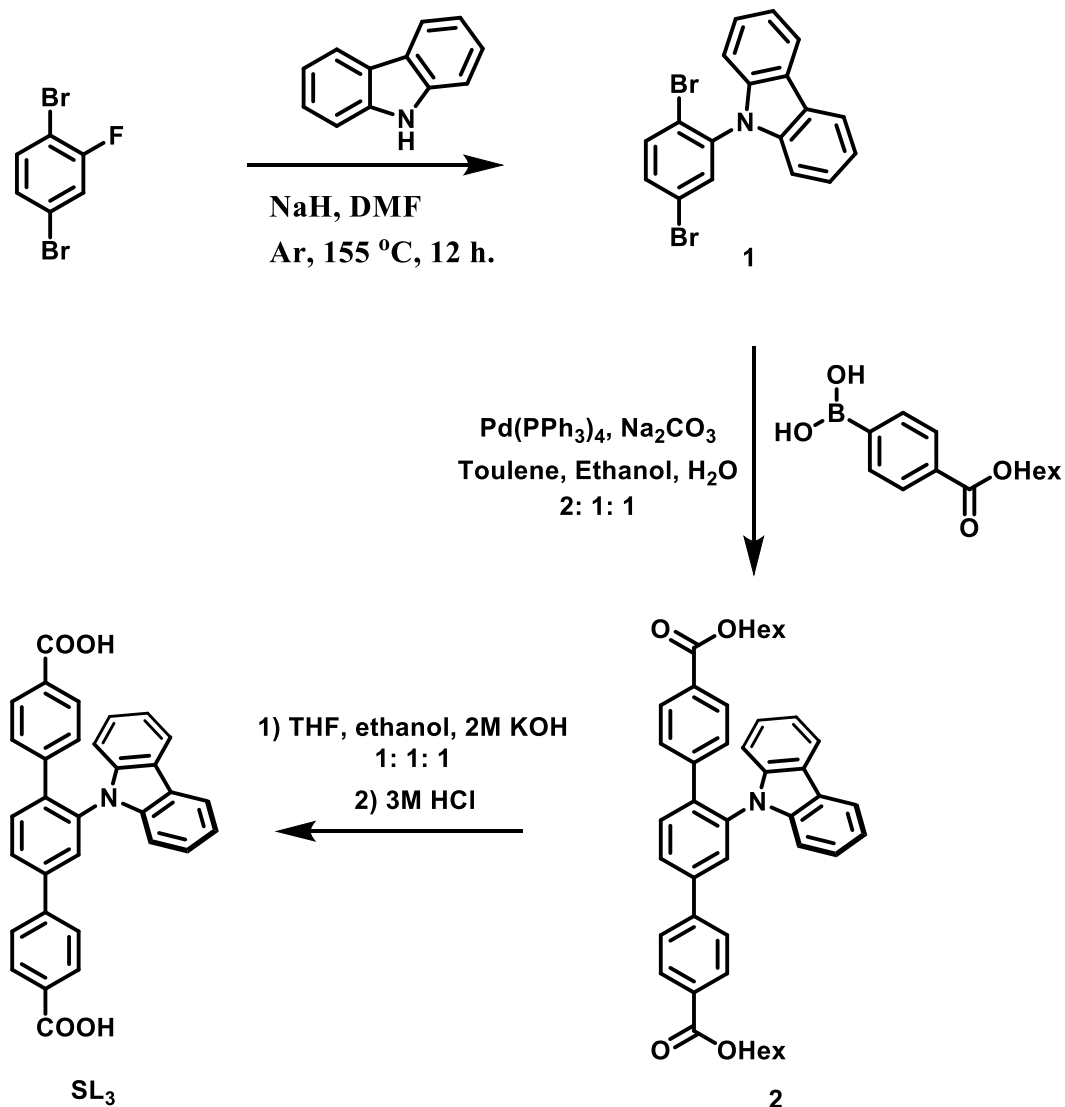

**Fig. S1.** Schematic synthesis of Secondary linker CzTPDC.

**Synthesis of 9-(2,5-dibromophenyl)-9H-carbazole (2):** A mixture of 9H-carbazole (4.6 g, 27.5 mmol), sodium hydride (1.2 g, 50.0 mmol) was stirred in dry *N,N*-dimethylformamide

(100 mL) at room temperature under Ar. After 30 min, 2,5-dibromo-fluorobenzene (**1**) (5.08 g, 20 mmol) was added. Then the mixture stirred at 155 °C for 12 h. After cooling to room temperature, the reaction mixture was poured into water and extracted by CH<sub>2</sub>Cl<sub>2</sub> three times, dried over anhydrous MgSO<sub>4</sub>. After filtration and evaporation, the crude product was purified by column chromatography on silica gel (hexane/dichloromethane = 4:1, v/v), and then concentrated under reduced pressure to afford a white solid in 46% yield. <sup>1</sup>H NMR (400 MHz, chloroform-*d*) δ 8.17 (d, *J* = 7.8 Hz, 2H), 7.75 (d, *J* = 8.6 Hz, 1H), 7.67 (s, 1H), 7.58 (d, *J* = 8.6 Hz, 1H), 7.43 (d, *J* = 7.8 Hz, 2H), 7.37 – 7.30 (m, 2H), 7.15 – 7.04 (m, 2H).

**Synthesis of dihexyl (s)-2'-(9H-carbazol-9-yl)-[1,1':4',1''-terphenyl]-4,4''-dicarboxylate (2):** Compound 1 (4.01 g, 10 mmol), (4-((hexanoyloxy)carbonyl) phenyl) boronic acid (6.6 g, 25 mmol), Na<sub>2</sub>CO<sub>3</sub> (8.5 g, 80 mmol) were dissolved in mixed solvent of toluene-ethanol-water (40 mL: 20 mL: 20 mL). After degassing by argon for 1 h, Pd (PPh<sub>3</sub>)<sub>4</sub> (0.8 g, 0.68 mmol) was added to the solution. The solution was stirred under argon atmosphere for 48 h under reflux at 100 °C. After filtration, the solvent was removed under reduced pressure, the resulting residue was purified using column chromatography of silica gel to obtain compound 2 in 66% yield. <sup>1</sup>H NMR (400 MHz, Chloroform-*d*) δ 8.18 – 8.13 (m, 2H), 8.09 (dt, *J* = 7.7, 1.1 Hz, 2H), 7.92 (dd, *J* = 8.1, 2.0 Hz, 1H), 7.84 – 7.78 (m, 2H), 7.77 – 7.73 (m, 2H), 7.73 – 7.69 (m, 2H), 7.32 (ddd, *J* = 8.3, 7.2, 1.3 Hz, 2H), 7.24 (td, *J* = 7.5, 1.1 Hz, 2H), 7.21 – 7.17 (m, 2H), 7.14 (dt, *J* = 8.2, 1.0 Hz, 2H), 4.36 (t, *J* = 6.7 Hz, 2H), 4.20 (t, *J* = 6.7 Hz, 2H), 1.85 – 1.76 (m, 2H), 1.73 – 1.62 (m, 2H), 1.43 – 1.24 (m, 12H), 0.95 – 0.86 (m, 6H).

**Synthesis of 5'-(9H-carbazol-9-yl)-[1,1':3',1''-terphenyl]-4,4''-dicarboxylic acid (CzTPDC):** Compound 2 (6.5 g, 10 mmol) was dissolved in a mixture of methanol (60 mL), THF (60 mL) and 2 M KOH (60 mL). The solution was degassed by for 1 hour, and then refluxed under

argon for 24 h and the solution became clear. Solvent was removed under reduced pressure, and the remaining solid was dissolved in water. 3 M HCl was added to the solution until pH = 2.0. After filtration, precipitate was recrystallized from DMF/water to obtain light yellow solid in 93 % yield.  $^1\text{H}$  NMR (400 MHz,  $\text{DMSO-}d_6$ )  $\delta$  8.16 (d,  $J = 7.7$  Hz, 2H), 8.12 (d,  $J = 8.1$  Hz, 1H), 8.03 (d,  $J = 8.1$  Hz, 2H), 7.95 (d,  $J = 6.8$  Hz, 3H), 7.89 (d,  $J = 8.0$  Hz, 1H), 7.57 (d,  $J = 8.0$  Hz, 2H), 7.31 (t,  $J = 7.6$  Hz, 2H), 7.24 – 7.10 (m, 6H).

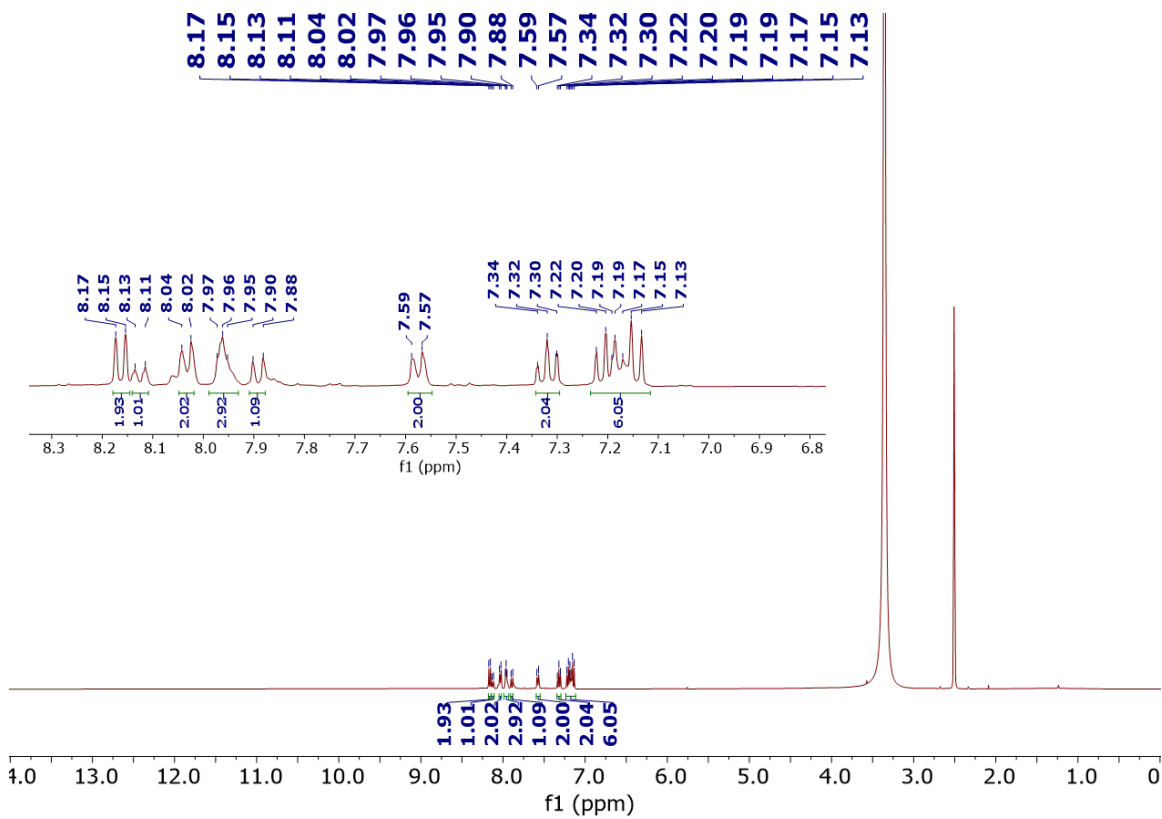

Fig. S2.  $^1\text{H}$  NMR spectrum of CzTPDC.



## S-2 Synthesis of NPF-320-RE

**Synthesis of NPF-320-Eu:** 3 mg of  $\text{Eu}(\text{NO}_3)_3 \cdot 6\text{H}_2\text{O}$  and 150 mg of 2-fluorobenzoic acid (2-FBA) were mixed in 1 mL DMF in a glass vial and ultrasonically dissolved. The clear solution was heated in an oven at 80 °C for 1 h. After cooling down to room temperature 3 mg of ligand **H<sub>4</sub>L** and 10  $\mu\text{L}$  trifluoroacetic acid (TFA) were added to this solution and the mixture was sonicated for 5 min to dissolve all ligand. Then the yellow solution was put into an oven and the temperature was increased from 30 °C to 115 °C in 2 h and then kept at 115 °C for 48 h. After cooling down to room temperature in 2 h, needle-shaped single crystals were obtained. (Fig. 3.18c) After activation, the samples were washed with fresh DMF and stay in DMF for further use.

**NPF-320-Tb** was synthesized in the similar procedure as that of NPF-320-Eu, except for the use of  $\text{Tb}(\text{NO}_3)_3 \cdot 6\text{H}_2\text{O}$  (3 mg) as the metal source.

### **NPF-320-Eu-SL<sub>1</sub>**

~4 mg activated NPF-320-Eu was soaked in 1 mL DMF solution of SL<sub>1</sub> (0.8 mg, 3.3  $\mu\text{mol}$ ). The sample was then put in oven and the temperature was increased from 30 °C to 60 °C in 2 h and then kept at 60 °C for 12 h. After cooled down to room temperature, the solvent was exchanged with fresh DMF at least three times within 12 h.

### **NPF-320-Eu-bpy**

~4 mg activated NPF-320-Eu was soaked in 1 mL DMF solution of SL<sub>bpy</sub> (0.8 mg, 3.3  $\mu\text{mol}$ ). The sample was then put in oven and the temperature was increased from 30 °C to 60 °C in 2 h and then kept at 60 °C for 12 h. After cooled down to room temperature, the solvent was exchanged with fresh DMF at least three times within 12 h.

### **NPF-320-Eu-SL<sub>2</sub>**

~4 mg activated NPF-320-Eu was soaked in 1 mL DMF solution of SL<sub>2</sub> (1.0 mg, 3.4  $\mu\text{mol}$ ).

The sample was then put in oven and the temperature was increased from 30 °C to 60 °C in 2 h and then kept at 60 °C for 12 h. After cooled down to room temperature, the solvent was exchanged with fresh DMF at least three times within 12 h.

#### **NPF-320-Eu-SL<sub>2</sub>-SL<sub>1</sub>**

~4 mg NPF-320-Eu-SL<sub>2</sub> sample was soaked in 1 mL DMF solution of SL<sub>1</sub> (0.8 mg, 3.3 μmol). The sample was then put in oven and the temperature was increased from 30 °C to 60 °C in 2 h and then kept at 60 °C for 12 h. After cooled down to room temperature, the solvent was exchanged with fresh DMF at least three times within 12 h.

#### **NPF-320-Eu-SL<sub>1</sub>-SL<sub>2</sub>**

~4 mg NPF-320-Eu-SL<sub>1</sub> sample was soaked in 1 mL DMF solution of SL<sub>2</sub> (1.0 mg, 3.4 μmol). The sample was then put in oven and the temperature was increased from 30 °C to 60 °C in 2 h and then kept at 60 °C for 12 h. After cooled down to room temperature, the solvent was exchanged with fresh DMF at least three times within 12 h.

#### **NPF-320-RE-CzTPDC**

~4 mg activated NPF-320-RE was soaked in 1 mL DMF solution of CzTPDC (1.7 mg, 3.3 μmol). The sample was then put in oven and the temperature was increased from 30 °C to 60 °C in 2 h and then kept at 60 °C for 12 h. After cooled down to room temperature, the solvent was exchanged with fresh DMF at least three times within 12 h.

#### **NPF-320-RE-CzDC**

~4 mg activated NPF-320-RE was soaked in 1 mL DMF solution of CzDC (1.1 mg, 3.3 μmol). The sample was then put in oven and the temperature was increased from 30 °C to 60 °C in 2 h and then kept at 60 °C for 12 h. After cooled down to room temperature, the solvent was exchanged with fresh DMF at least three times within 12 h.

Modulator:

2-fluorobenzoic acid (2-FBA)

more trifluoroacetic acid (TFA)

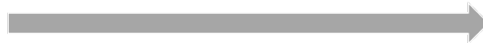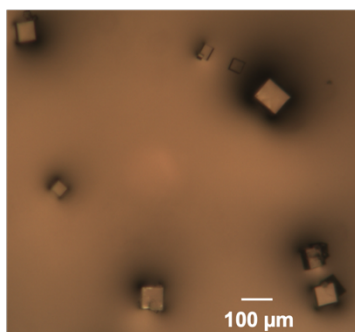

**ftw**  
(cubic crystals)

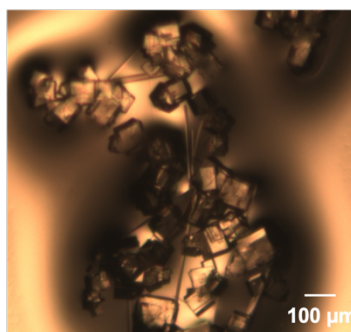

**mixed ftw and scu**

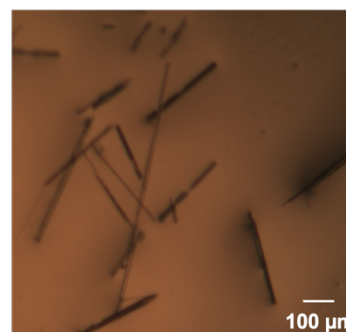

**scu**  
(needle-shaped)

**Fig. S3.** Optical microscopic images of single crystals showing the formation of pure phase of NPF-320-Eu in the presence of an optimal ratio of 2-FBA and TFA modulators.

### S-3 Crystallographic Data and Structural Representation

All samples were collected from the mother liquid, transferred to oil, then mounted onto glass fiber tips for low temperature (100 K) measurement. For room temperature data collection, crystals were sealed in a glass capillary with mother liquid. Single crystal X-ray diffraction data was collected using synchrotron radiation at the Advanced Light Source, Lawrence Berkeley National Laboratory. Indexing was performed using APEX3 (Difference Vectors method). Space groups were determined using XPREP implemented in APEX3. The structure was solved using SHELXS97 (direct methods) and refined using SHELXL-97 within Olex 2 (full-matrix least-squares on F<sup>2</sup>). RE, C, O, N atoms were refined with anisotropic displacement parameters and H atoms were placed in geometrically calculated positions and included in the refinement process using the riding model with isotropic thermal parameters:  $U_{iso}(H) = 1.2U_{eq}(-CH)$ . The contributions from disordered solvent molecules were treated as diffusion using the SQUEEZE method implemented in PLATON. Crystal data and refinement conditions are shown in the below tables.

**Table S1.** Crystal data and structure refinement

|                                                              |                                                                                |                                                                                |                                                                                 |
|--------------------------------------------------------------|--------------------------------------------------------------------------------|--------------------------------------------------------------------------------|---------------------------------------------------------------------------------|
| Compound name                                                | NPF-320-Eu                                                                     | NPF-320-Tb                                                                     | NPF-320-Eu-SL <sub>2</sub>                                                      |
| Empirical formula                                            | C <sub>96</sub> H <sub>60</sub> O <sub>24</sub> Eu <sub>6</sub> F <sub>8</sub> | C <sub>96</sub> H <sub>60</sub> F <sub>8</sub> O <sub>24</sub> Tb <sub>6</sub> | C <sub>118</sub> H <sub>76</sub> Eu <sub>6</sub> F <sub>8</sub> O <sub>24</sub> |
| Formula weight                                               | 2661.20                                                                        | 2702.96                                                                        | 2941.54                                                                         |
| Temperature/K                                                | 100(2)                                                                         | 100(2)                                                                         | 100(2)                                                                          |
| Crystal system                                               | orthorhombic                                                                   | orthorhombic                                                                   | orthorhombic                                                                    |
| Space group                                                  | <i>Cmmm</i>                                                                    | <i>Cmmm</i>                                                                    | <i>Cmmm</i>                                                                     |
| <i>a</i> /Å                                                  | 23.518(3)                                                                      | 21.99(5)                                                                       | 23.931(15)                                                                      |
| <i>b</i> /Å                                                  | 34.114(4)                                                                      | 34.73(7)                                                                       | 34.29(2)                                                                        |
| <i>c</i> /Å                                                  | 20.351(2)                                                                      | 20.54(4)                                                                       | 20.367(13)                                                                      |
| $\alpha$ /°                                                  | 90                                                                             | 90                                                                             | 90                                                                              |
| $\beta$ /°                                                   | 90                                                                             | 90                                                                             | 90                                                                              |
| $\gamma$ /°                                                  | 90                                                                             | 90                                                                             | 90                                                                              |
| Volume/Å <sup>3</sup>                                        | 16327(3)                                                                       | 15679(57)                                                                      | 16710(18)                                                                       |
| <i>Z</i>                                                     | 2                                                                              | 2                                                                              | 2                                                                               |
| $\rho_{\text{calc}}/\text{cm}^3$                             | 0.541                                                                          | 0.573                                                                          | 0.585                                                                           |
| $\mu/\text{mm}^{-1}$                                         | 1.229                                                                          | 1.443                                                                          | 1.205                                                                           |
| <i>F</i> (000)                                               | 2556.0                                                                         | 2580.0                                                                         | 2852.0                                                                          |
| Crystal size/mm <sup>3</sup>                                 | 0.2×0.01×0.01 mm <sup>3</sup>                                                  | 0.2×0.01×0.01 mm <sup>3</sup>                                                  | 0.2×0.01×0.01 mm <sup>3</sup>                                                   |
| Radiation                                                    | synchrotron ( $\lambda$ = 0.7288)                                              | synchrotron ( $\lambda$ = 0.7288)                                              | synchrotron ( $\lambda$ = 0.7288)                                               |
| 2 $\Theta$ range for data collection/°                       | 2.156 to 53.47                                                                 | 2.248 to 58.138                                                                | 2.128 to 65.894                                                                 |
| Reflections collected                                        | 110881                                                                         | 89325                                                                          | 223977                                                                          |
| Independent reflections                                      | 8644 [ <i>R</i> <sub>int</sub> = 0.1807, <i>R</i> <sub>sigma</sub> = 0.0865]   | 10394 [ <i>R</i> <sub>int</sub> = 0.2025, <i>R</i> <sub>sigma</sub> = 0.1231]  | 15440 [ <i>R</i> <sub>int</sub> = 0.0828, <i>R</i> <sub>sigma</sub> = 0.0436]   |
| Data/restraints/parameters                                   | 8644/55/186                                                                    | 10394/233/186                                                                  | 15440/184/208                                                                   |
| Goodness-of-fit on <i>F</i> <sup>2</sup>                     | 1.088                                                                          | 1.126                                                                          | 1.005                                                                           |
| Final <i>R</i> indexes [ <i>I</i> ≥ 2 $\sigma$ ( <i>I</i> )] | <i>R</i> <sub>1</sub> = 0.0594<br><i>wR</i> <sub>2</sub> = 0.1864              | <i>R</i> <sub>1</sub> = 0.2233<br><i>wR</i> <sub>2</sub> = 0.5066              | <i>R</i> <sub>1</sub> = 0.0459<br><i>wR</i> <sub>2</sub> = 0.1365               |
| Final <i>R</i> indexes [all data]                            | <i>R</i> <sub>1</sub> = 0.0871<br><i>wR</i> <sub>2</sub> = 0.2205              | <i>R</i> <sub>1</sub> = 0.2595<br><i>wR</i> <sub>2</sub> = 0.5258              | <i>R</i> <sub>1</sub> = 0.0745<br><i>wR</i> <sub>2</sub> = 0.1522               |
| Largest diff. peak/hole / e Å <sup>-3</sup>                  | 2.36/-2.14                                                                     | 5.67/-10.48                                                                    | 1.69/-2.19                                                                      |

|                                             |                                                                                 |                                                                                 |                                                                                                |
|---------------------------------------------|---------------------------------------------------------------------------------|---------------------------------------------------------------------------------|------------------------------------------------------------------------------------------------|
| Compound name                               | NPF-320-Eu- <b>SL<sub>2</sub></b> - <b>SL<sub>1</sub></b>                       | NPF-320-Eu- <b>SL<sub>1</sub></b>                                               | NPF-320-Eu-bpy                                                                                 |
| Empirical formula                           | C <sub>132</sub> H <sub>86</sub> Eu <sub>6</sub> F <sub>8</sub> O <sub>24</sub> | C <sub>110</sub> H <sub>68</sub> O <sub>24</sub> Eu <sub>6</sub> F <sub>8</sub> | C <sub>108</sub> H <sub>66</sub> Eu <sub>6</sub> N <sub>2</sub> O <sub>24</sub> F <sub>8</sub> |
| Formula weight                              | 3119.76                                                                         | 2837.40                                                                         | 2839.38                                                                                        |
| Temperature/K                               | 100(2)                                                                          | 273(2)                                                                          | 100(2)                                                                                         |
| Crystal system                              | orthorhombic                                                                    | orthorhombic                                                                    | orthorhombic                                                                                   |
| Space group                                 | <i>Cmmm</i>                                                                     | <i>Cmmm</i>                                                                     | <i>Cmmm</i>                                                                                    |
| a/Å                                         | 23.57(2)                                                                        | 21.789(19)                                                                      | 35.745(9)                                                                                      |
| b/Å                                         | 34.24(3)                                                                        | 35.57(3)                                                                        | 21.754(6)                                                                                      |
| c/Å                                         | 20.209(17)                                                                      | 20.129(16)                                                                      | 19.697(5)                                                                                      |
| α/°                                         | 90                                                                              | 90                                                                              | 90                                                                                             |
| β/°                                         | 90                                                                              | 90                                                                              | 90                                                                                             |
| γ/°                                         | 90                                                                              | 90                                                                              | 90                                                                                             |
| Volume/Å <sup>3</sup>                       | 16315(24)                                                                       | 15601(23)                                                                       | 15316(7)                                                                                       |
| Z                                           | 2                                                                               | 2                                                                               | 2                                                                                              |
| ρ <sub>calc</sub> /cm <sup>3</sup>          | 0.635                                                                           | 0.604                                                                           | 0.616                                                                                          |
| μ/mm <sup>-1</sup>                          | 1.236                                                                           | 1.289                                                                           | 1.313                                                                                          |
| F (000)                                     | 3040.0                                                                          | 2740.0                                                                          | 2740.0                                                                                         |
| Crystal size/mm <sup>3</sup>                | 0.2×0.01×0.01 mm <sup>3</sup>                                                   | 0.2×0.01×0.01 mm <sup>3</sup>                                                   | 0.2×0.01×0.01 mm <sup>3</sup>                                                                  |
| Radiation                                   | synchrotron (λ = 0.7288)                                                        | synchrotron (λ = 0.7288)                                                        | synchrotron (λ = 0.7288)                                                                       |
| 2θ range for data collection/°              | 3.544 to 63.756                                                                 | 2.348 to 40.614                                                                 | 3.09 to 42.758                                                                                 |
| Reflections collected                       | 215366                                                                          | 47072                                                                           | 63471                                                                                          |
| Independent reflections                     | 13796 [R <sub>int</sub> = 0.0821, R <sub>sigma</sub> = 0.0364]                  | 3867 [R <sub>int</sub> = 0.0857, R <sub>sigma</sub> = 0.0412]                   | 4394 [R <sub>int</sub> = 0.1966, R <sub>sigma</sub> = 0.0775]                                  |
| Data/restraints/parameters                  | 13796/139/250                                                                   | 3867/284/199                                                                    | 4394/263/210                                                                                   |
| Goodness-of-fit on F <sup>2</sup>           | 1.029                                                                           | 1.135                                                                           | 1.112                                                                                          |
| Final R indexes [I ≥ 2σ (I)]                | R <sub>1</sub> = 0.0648<br>wR <sub>2</sub> = 0.2023                             | R <sub>1</sub> = 0.1554<br>wR <sub>2</sub> = 0.3855                             | R <sub>1</sub> = 0.1503<br>wR <sub>2</sub> = 0.3392                                            |
| Final R indexes [all data]                  | R <sub>1</sub> = 0.0881<br>wR <sub>2</sub> = 0.2265                             | R <sub>1</sub> = 0.1665<br>wR <sub>2</sub> = 0.3977                             | R <sub>1</sub> = 0.1913<br>wR <sub>2</sub> = 0.3698                                            |
| Largest diff. peak/hole / e Å <sup>-3</sup> | 1.98/-3.24                                                                      | 2.79/-2.29                                                                      | 5.07/-5.19                                                                                     |

|                                             |                                                                                   |
|---------------------------------------------|-----------------------------------------------------------------------------------|
| Compound name                               | NPF-320-Tb-CzTPDC                                                                 |
| Empirical formula                           | C <sub>130</sub> H <sub>79</sub> O <sub>24</sub> Tb <sub>6</sub> F <sub>8</sub> N |
| Formula weight                              | 3144.46                                                                           |
| Temperature/K                               | 273(2)                                                                            |
| Crystal system                              | orthorhombic                                                                      |
| Space group                                 | <i>Immm</i>                                                                       |
| a/Å                                         | 23.61(3)                                                                          |
| b/Å                                         | 33.79(4)                                                                          |
| c/Å                                         | 40.29(5)                                                                          |
| α/°                                         | 90                                                                                |
| β/°                                         | 90                                                                                |
| γ/°                                         | 90                                                                                |
| Volume/Å <sup>3</sup>                       | 32143(69)                                                                         |
| Z                                           | 4                                                                                 |
| ρ <sub>calc</sub> /cm <sup>3</sup>          | 0.650                                                                             |
| μ/mm <sup>-1</sup>                          | 1.413                                                                             |
| F (000)                                     | 6080.0                                                                            |
| Crystal size/mm <sup>3</sup>                | 0.2×0.01×0.01 mm <sup>3</sup>                                                     |
| Radiation                                   | synchrotron (λ = 0.7288)                                                          |
| 2θ range for data collection/°              | 1.612 to 52.08                                                                    |
| Reflections collected                       | 321943                                                                            |
| Independent reflections                     | 15614 [R <sub>int</sub> = 0.1609, R <sub>sigma</sub> = 0.0618]                    |
| Data/restraints/parameters                  | 15614/492/613                                                                     |
| Goodness-of-fit on F <sup>2</sup>           | 1.090                                                                             |
| Final R indexes [I ≥ 2σ (I)]                | R <sub>1</sub> = 0.0949<br>wR <sub>2</sub> = 0.2856                               |
| Final R indexes [all data]                  | R <sub>1</sub> = 0.1318<br>wR <sub>2</sub> = 0.3181                               |
| Largest diff. peak/hole / e Å <sup>-3</sup> | 4.70/-6.89                                                                        |

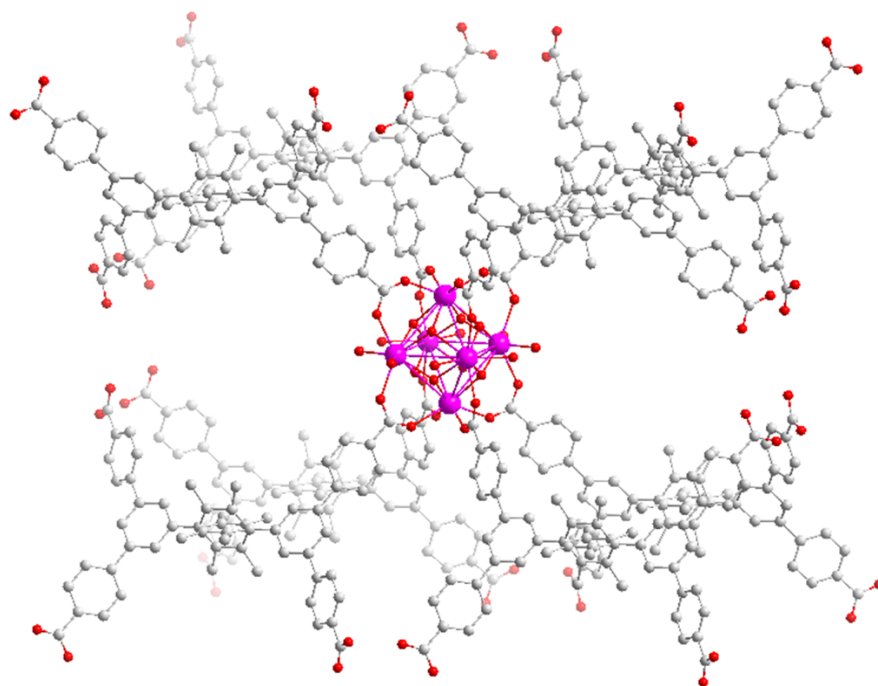

Fig. S4. Eu<sub>6</sub> cluster connected to eight ligand L<sup>4</sup>, with terminal H<sub>2</sub>O/OH<sup>-</sup>.

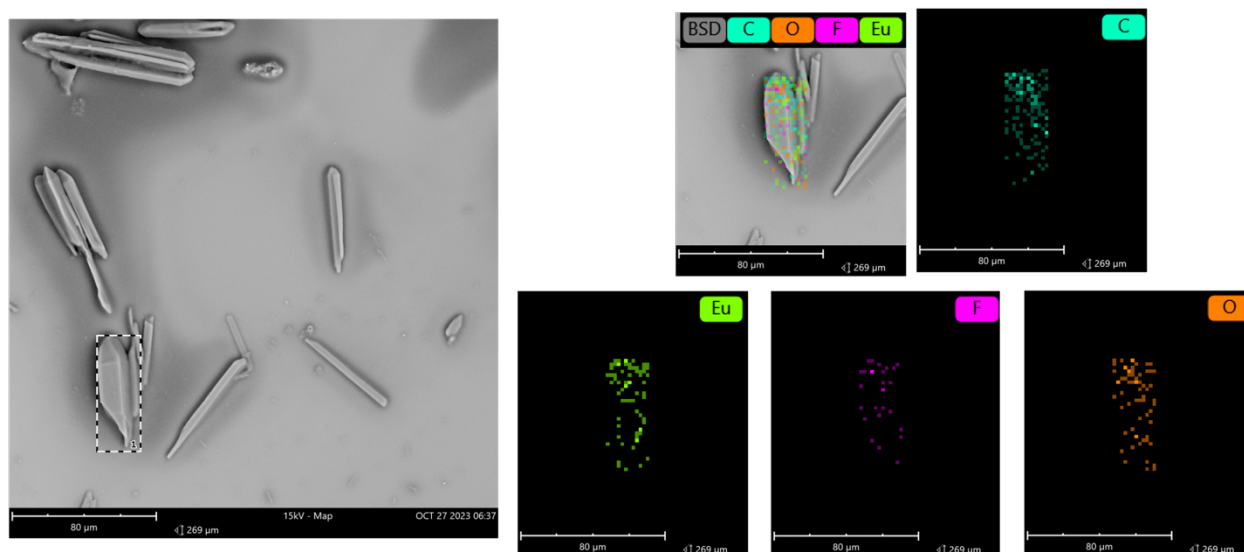

Fig. S5. SEM and energy dispersive X-ray (EDX) mapping analysis of NPF-320-Eu.



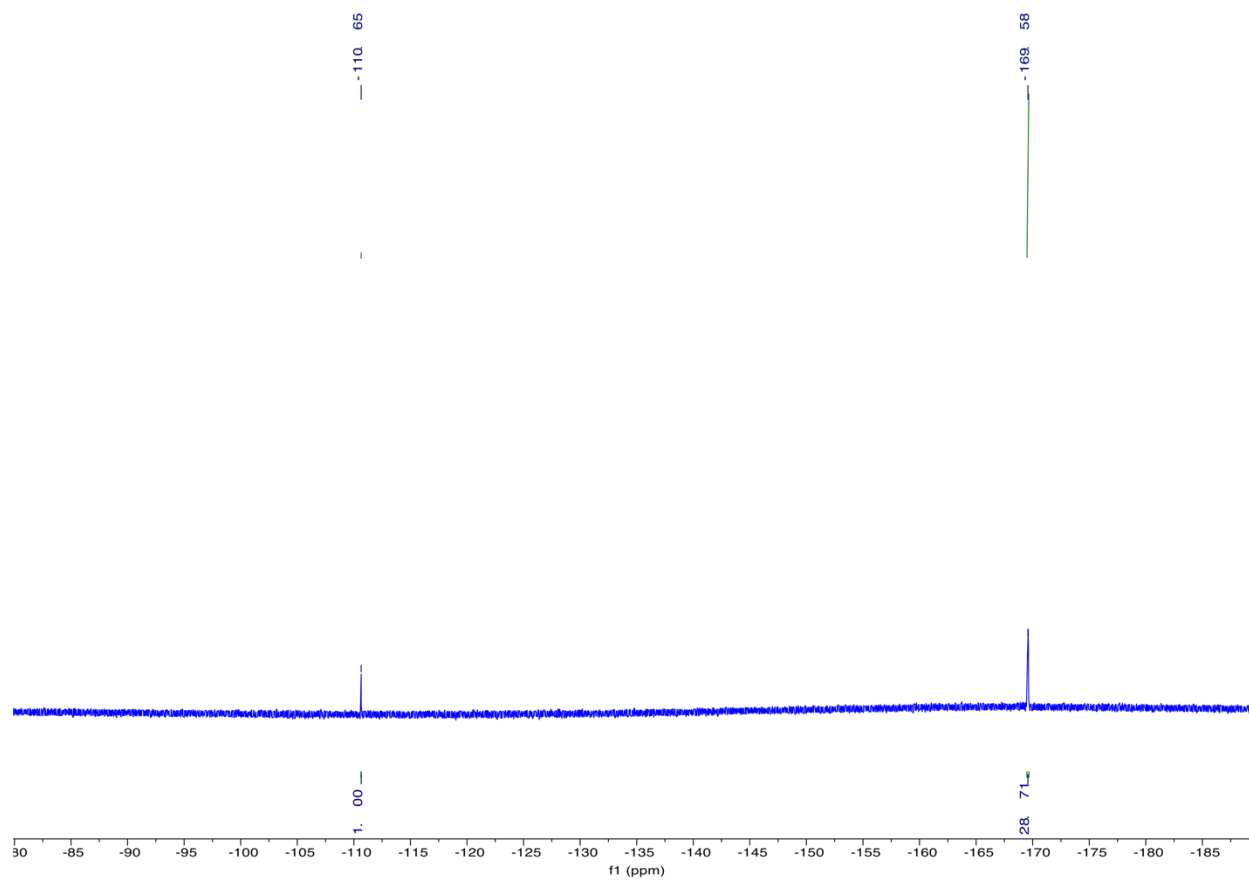

**Fig. S6.**  $^{19}\text{F}$  NMR spectrum of digested NPF-320-Eu showing the free F- species at -169 ppm (originating from the  $\text{Eu}_6(\mu_3\text{-F})_8$  clusters) and a trace amount of 2-FBA.

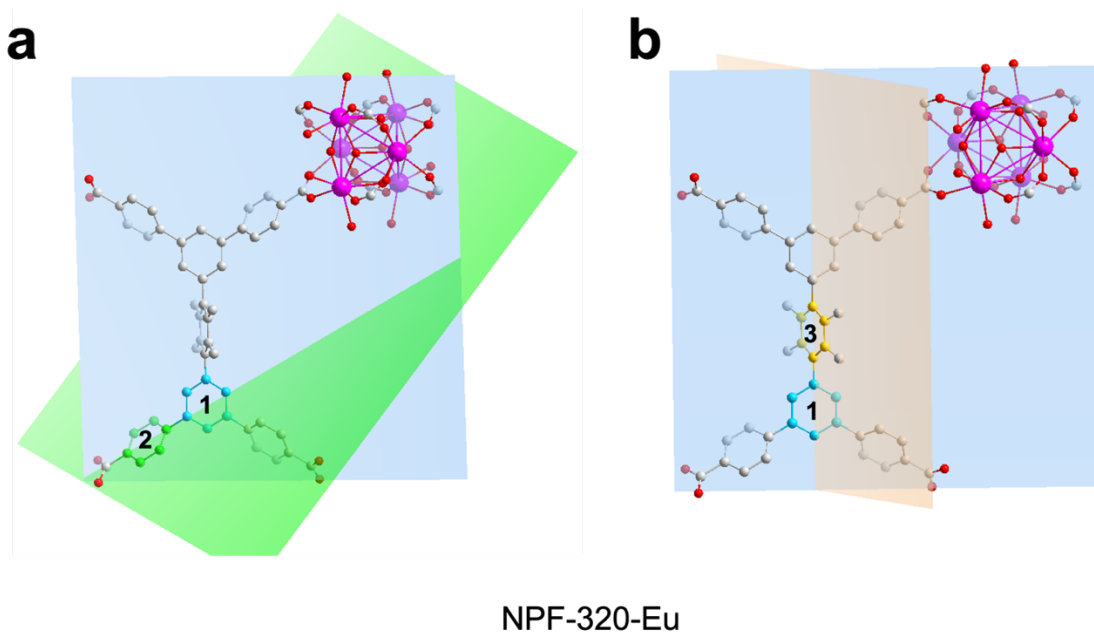

**Fig. S7.** Dihedral angle between (a) phenyl ring 1 and 2 ( $39.9^\circ$ ) and (b) phenyl ring 1 and 3 ( $60.3^\circ$ ) in NPF-320-Eu.

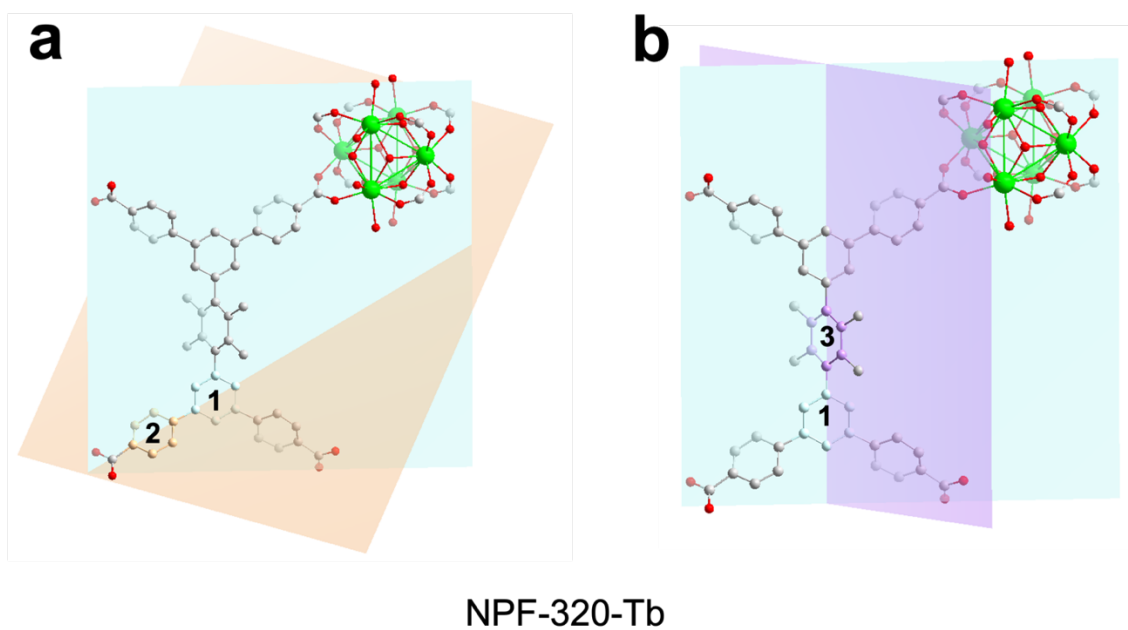

**Fig. S8.** Dihedral angle between (a) phenyl ring 1 and 2 ( $39.4^\circ$ ) and (b) phenyl ring 1 and 3 ( $54.6^\circ$ ) in NPF-320-Tb.

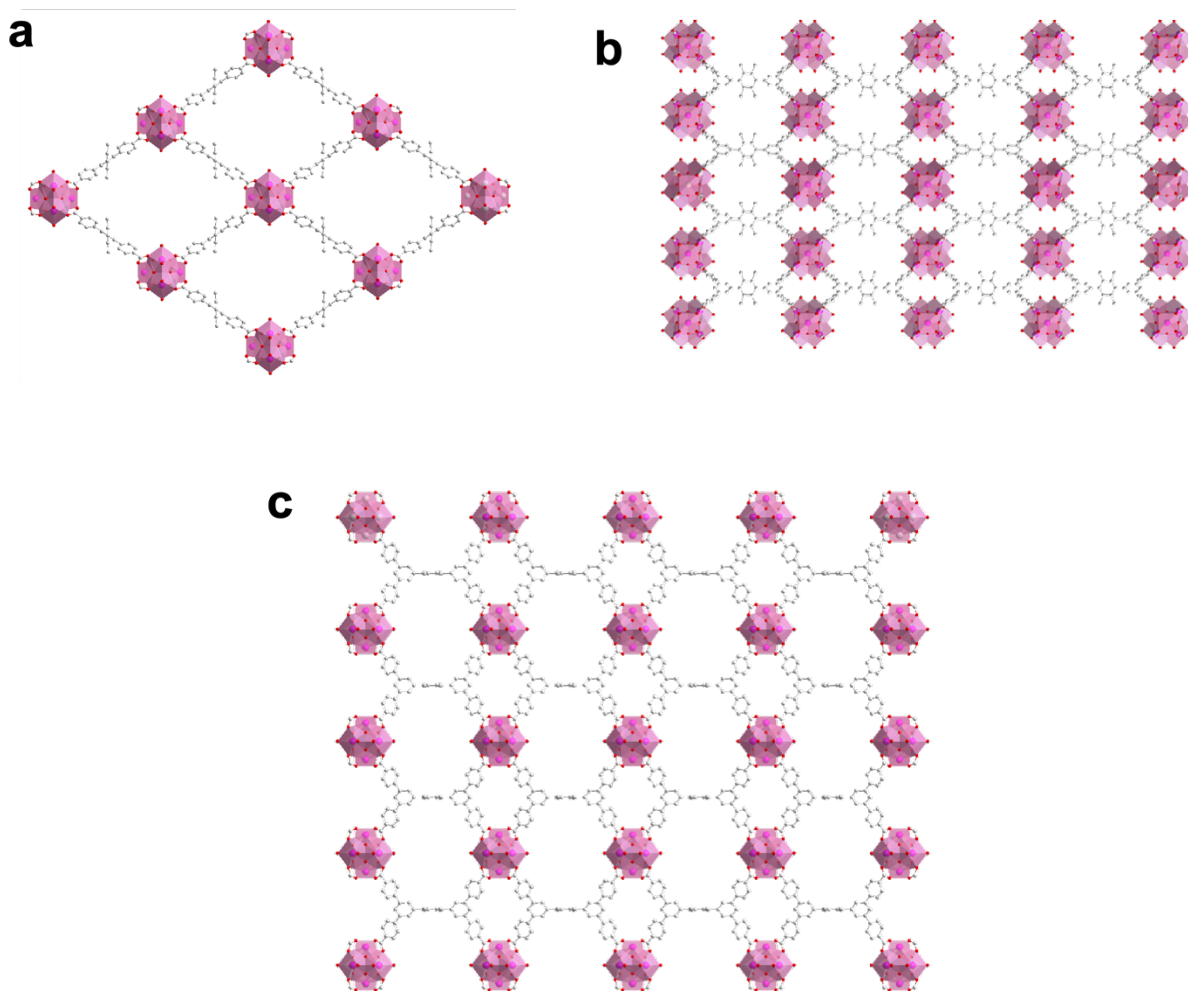

**Fig. S9.** Crystal packing diagrams of NPF-320-Eu viewed along (a) *c* axis, (b) *b* axis, and (c) *a* axis, showing the three rhombic channels ( $27 \times 15 \text{ \AA}$  along the *c* axis,  $7 \times 12 \text{ \AA}$  along the *b* axis,  $5 \times 9 \text{ \AA}$  along the *a* axis) and one hexagonal channel with a diameter of  $12 \text{ \AA}$  along *a* axis.

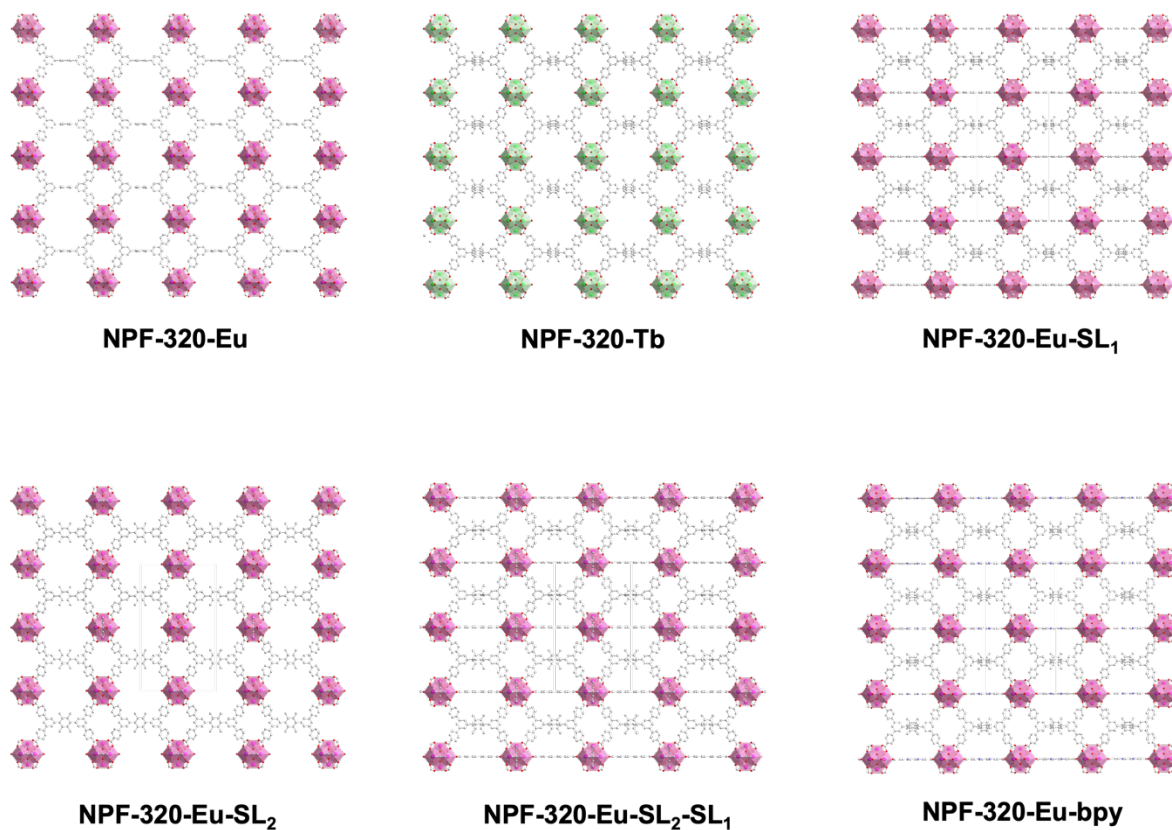

Fig. S10. Crystal structures of NPF-320-RE series viewed along  $a$  axis.

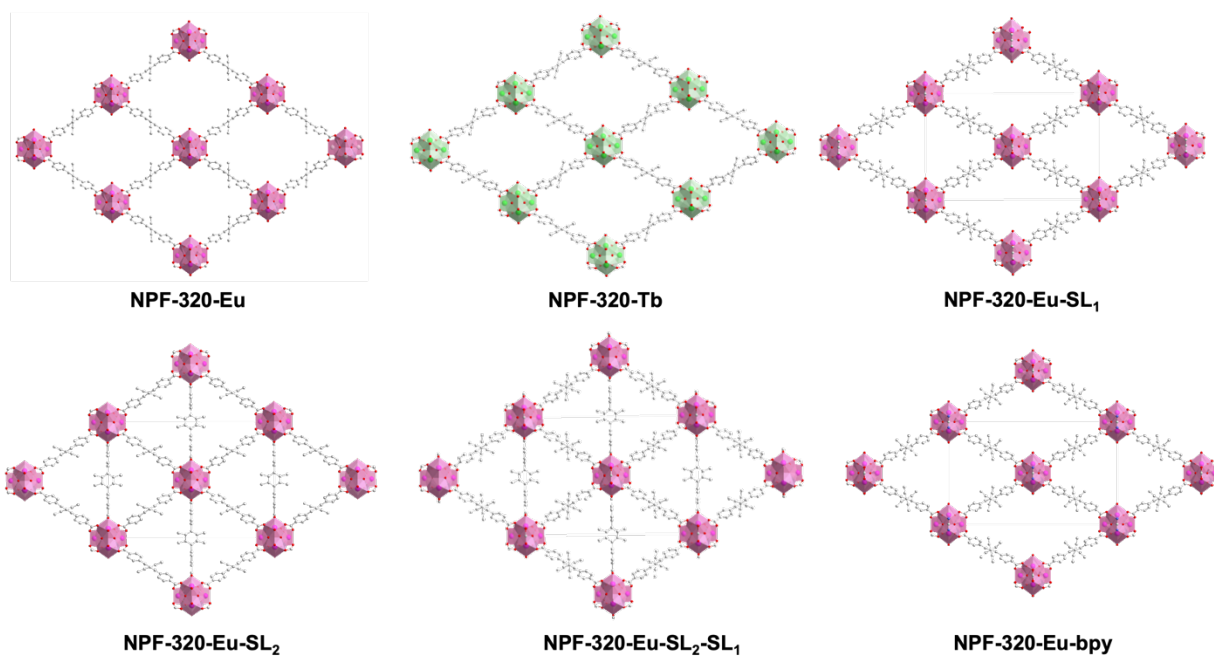

Fig. S11. Crystal structures of NPF-320-RE series viewed along  $c$  axis.

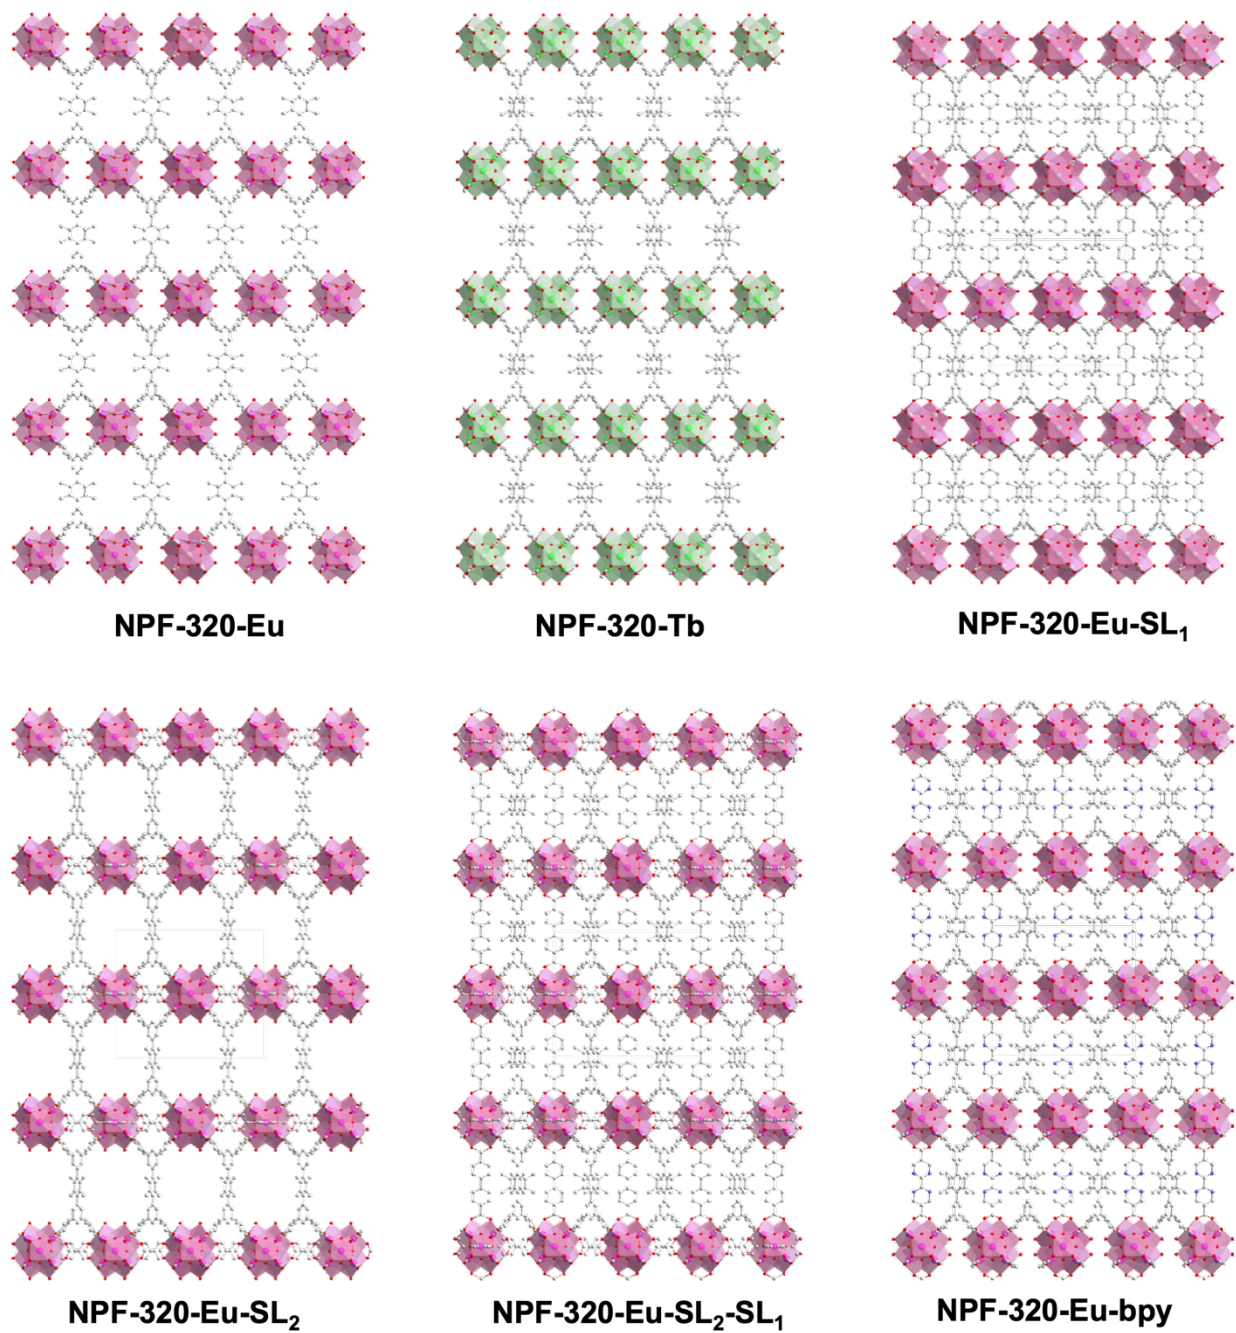

**Fig. S12.** Crystal structures of NPF-320-RE series viewed along *b* axis.

## S-5 PXRD patterns of NPF-320-RE

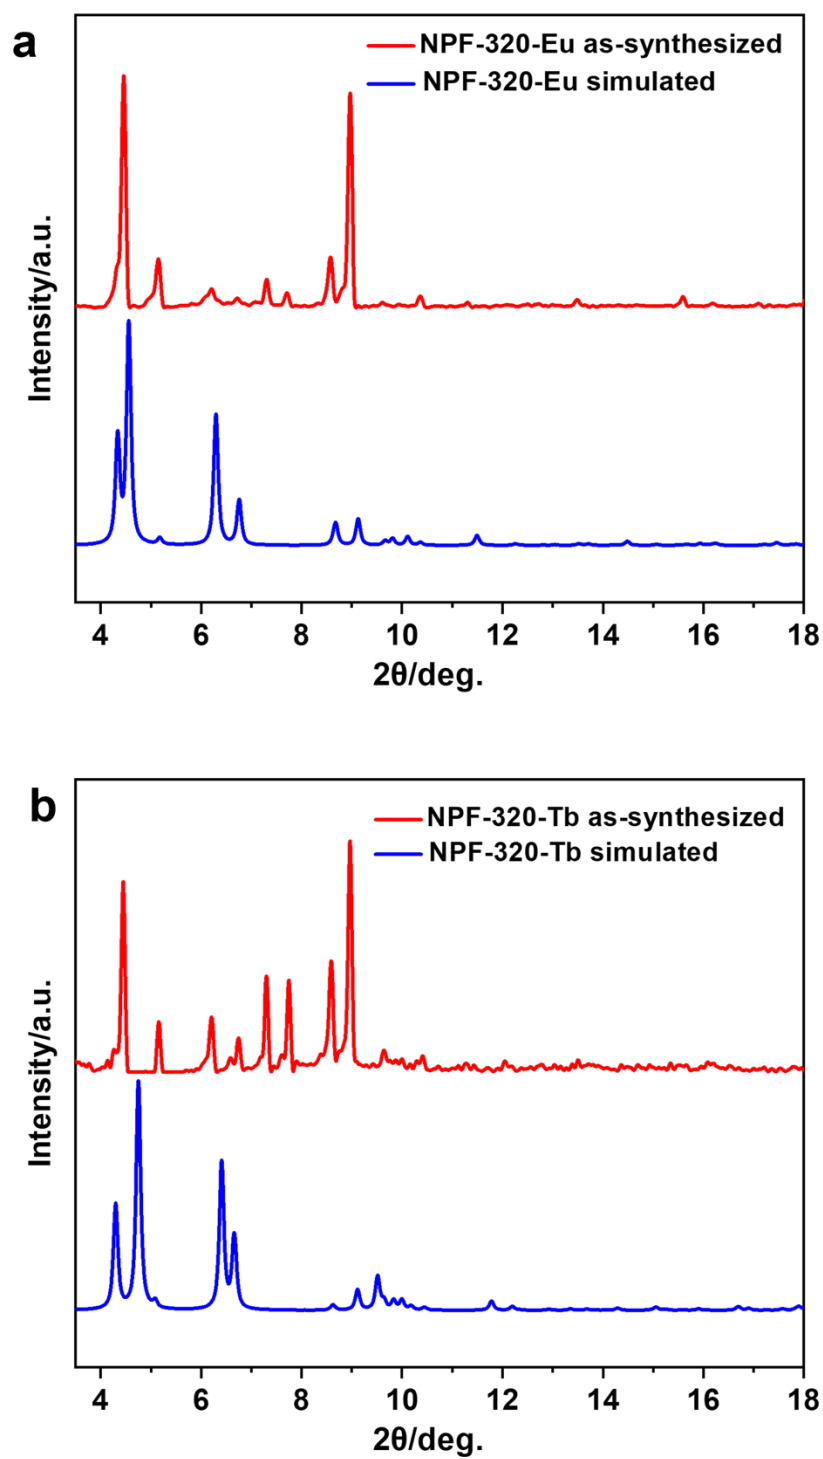

Fig. S13. PXRD patterns of NPF-320-Eu and NPF-320-Tb.

## S-6 Composition and Structural Characterization of NPF-320-RE after the Insertion of Secondary Linkers

To further support the linker insertion within NPF-320-RE, the molar ratio of primary linkers and secondary linkers were determined by base and acid digestion (detailed procedures are described in S-1), followed by  $^1\text{H}$  NMR measurement. Figs S14-S19 show the  $^1\text{H}$  NMR spectra obtained from the digestion of each insertion.

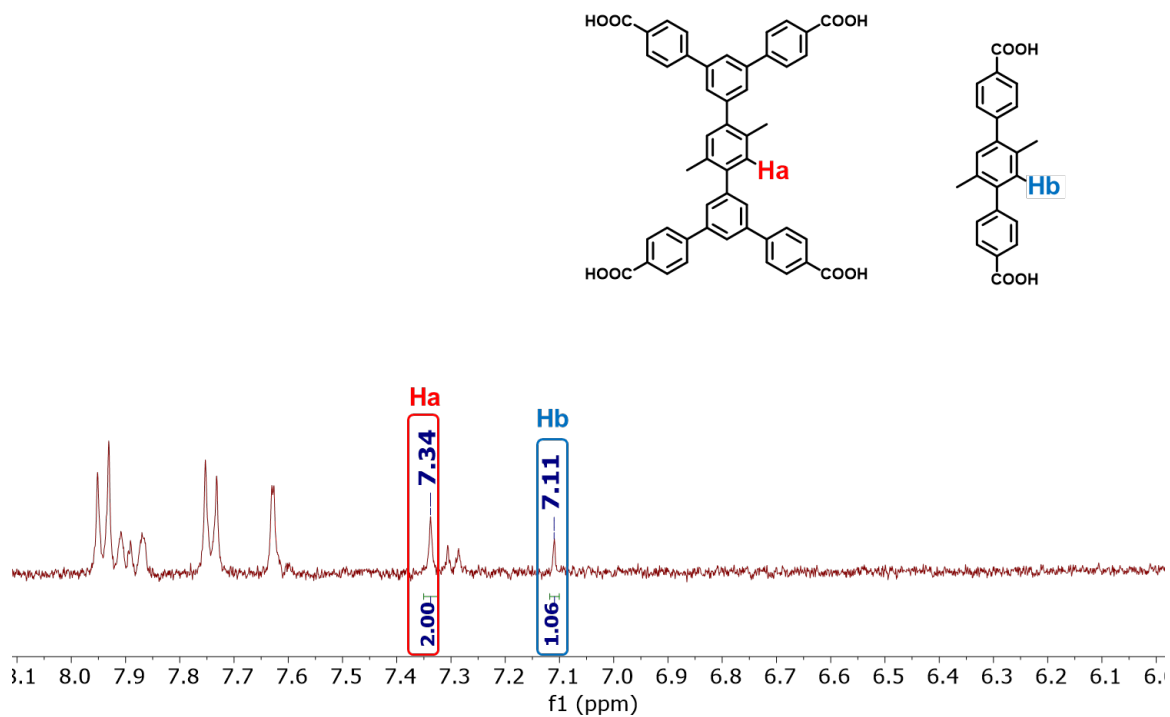

**Fig. S14.**  $^1\text{H}$  NMR spectrum of digested NPF-320-Eu-SL<sub>2</sub>. L:SL<sub>2</sub> = 2.0:1.1 (theoretical ratio = 2:1).

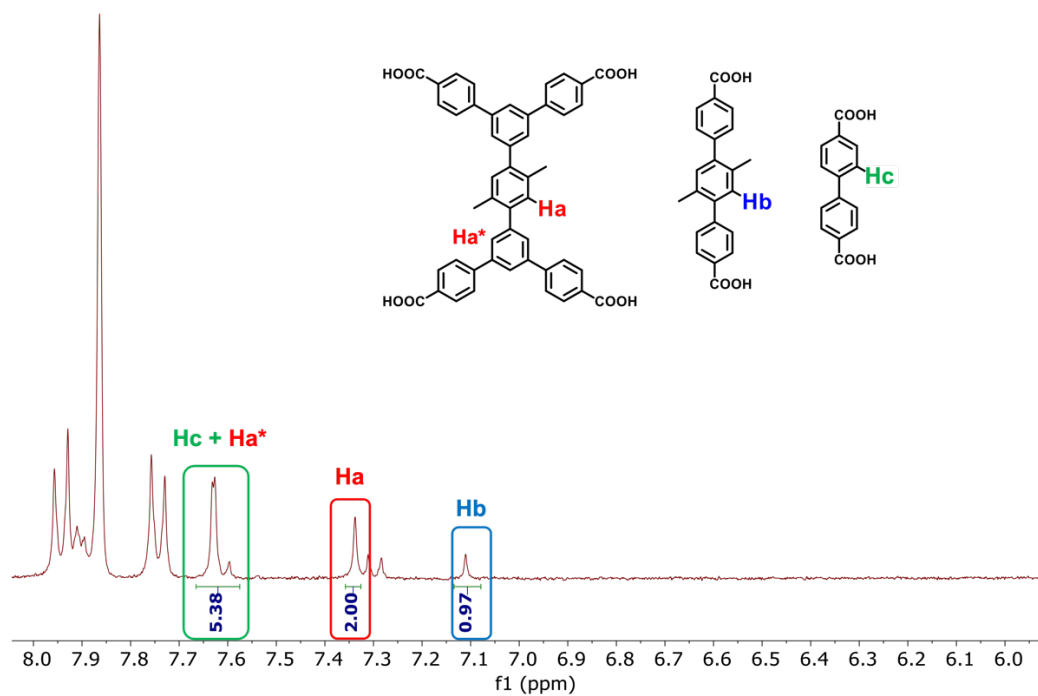

**Fig. S15.** <sup>1</sup>H NMR spectrum of digested NPF-320-Eu-SL<sub>2</sub>-SL<sub>1</sub>. L:SL<sub>2</sub>:SL<sub>1</sub> = 2.0:1.0:0.7 (theoretical ratio = 2:1:1).



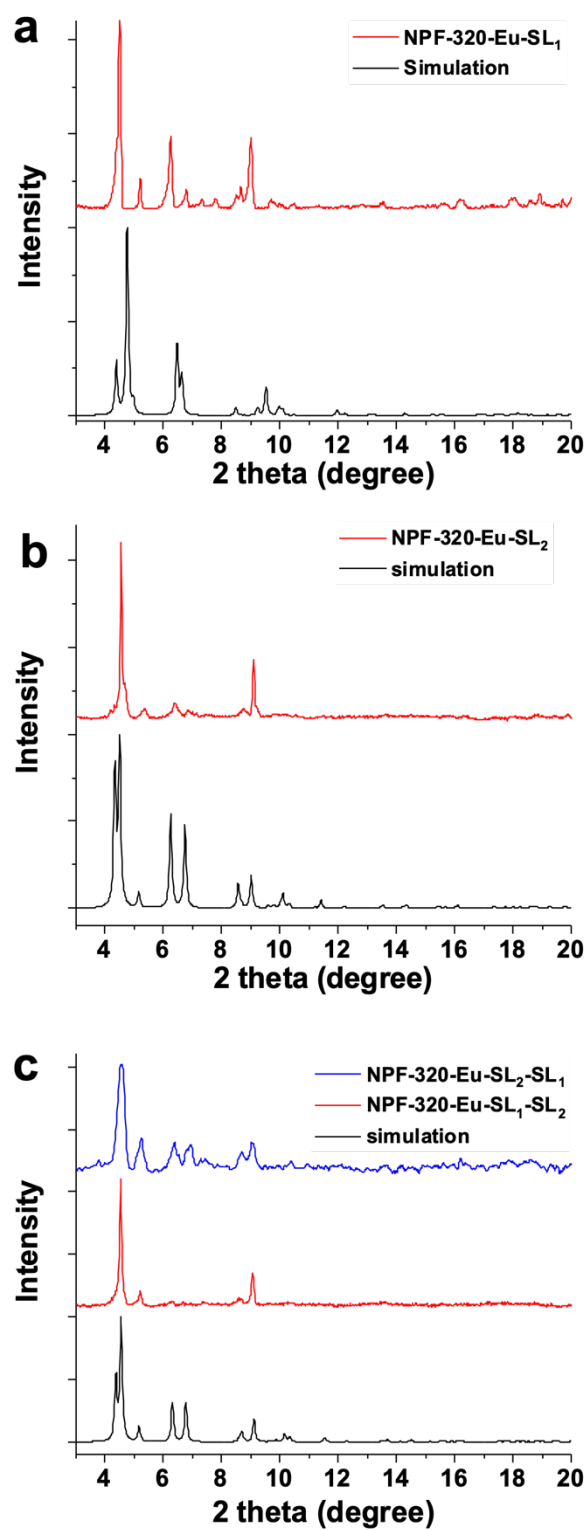

**Fig. S16.** PXRD patterns of (a) NPF-320-Eu-SL<sub>1</sub>, (b) NPF-320-Eu-SL<sub>1</sub>, and (c) NPF-320-Eu-SL<sub>1</sub>-SL<sub>2</sub> and NPF-320-Eu-SL<sub>2</sub>-SL<sub>1</sub>.

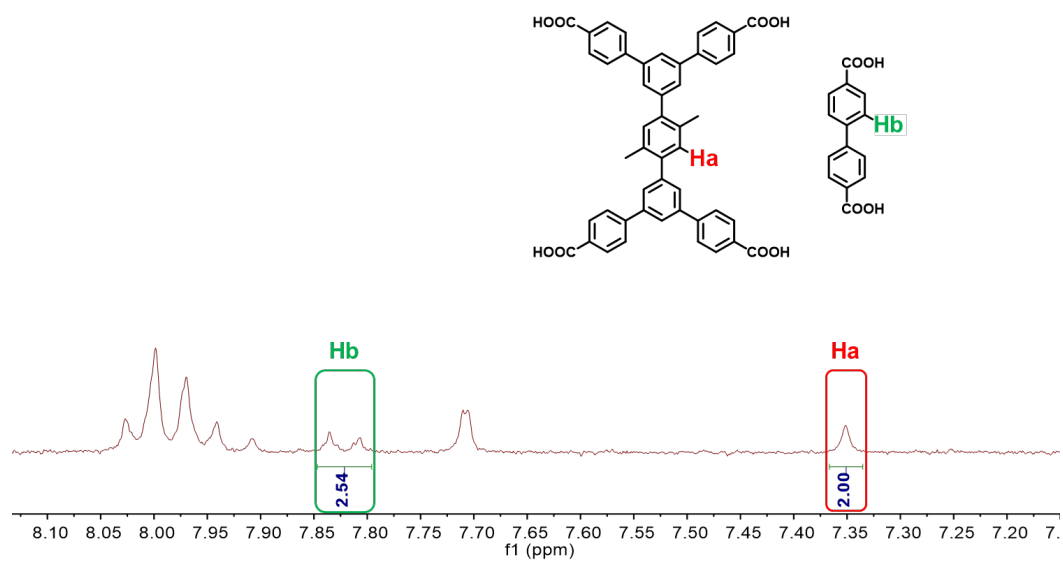

Fig. S17. <sup>1</sup>H NMR spectrum of digested NPF-320-Eu-SL<sub>1</sub>. L:SL<sub>1</sub> = 2.0:1.3 (theoretical ratio = 2:1).

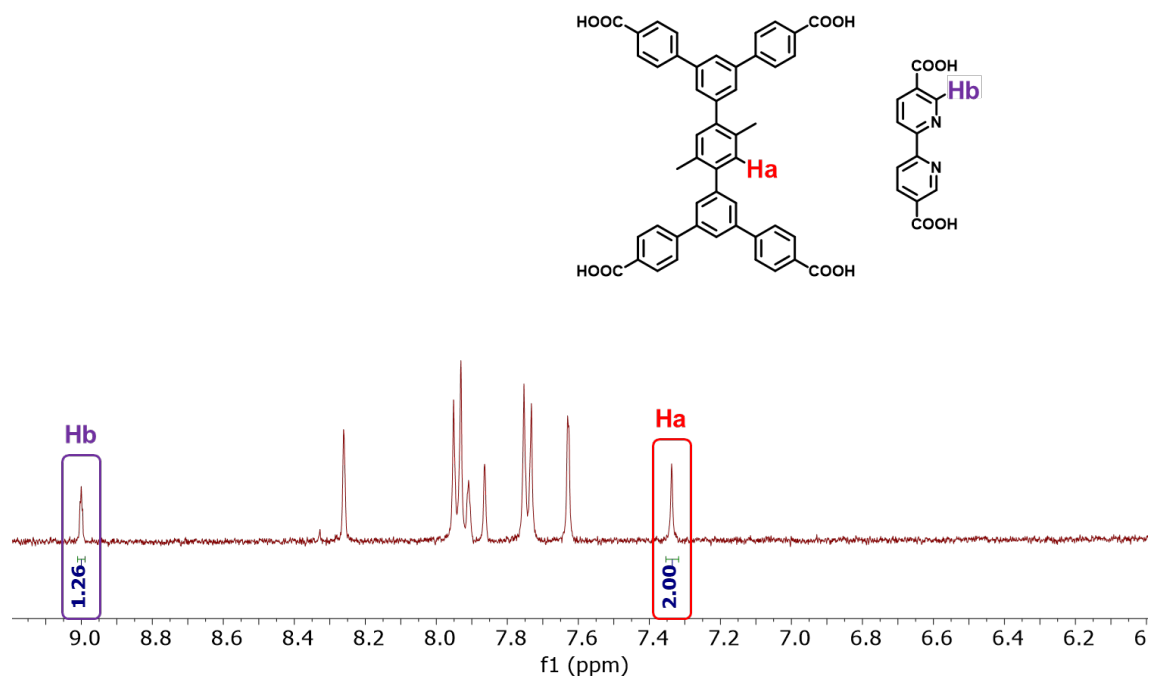

Fig. S18. <sup>1</sup>H NMR spectrum of digested NPF-320-Eu-bpy. L:bpy = 2.0:1.3 (theoretical ratio = 2:1).

## S-7 Post-synthetic Installation of Photosensitizers

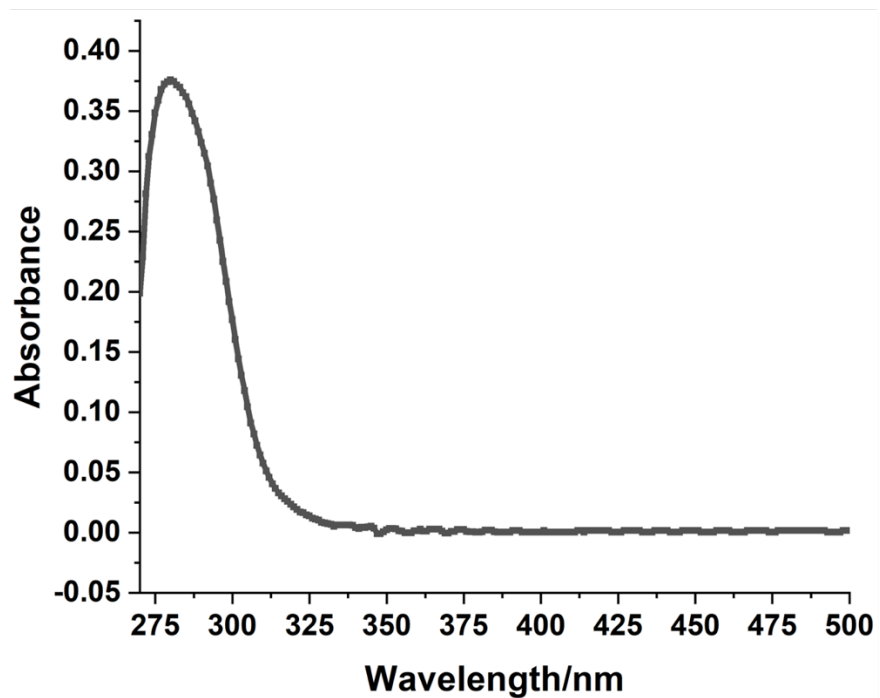

Fig. S19. UV-vis spectrum of H<sub>4</sub>L in DMF.

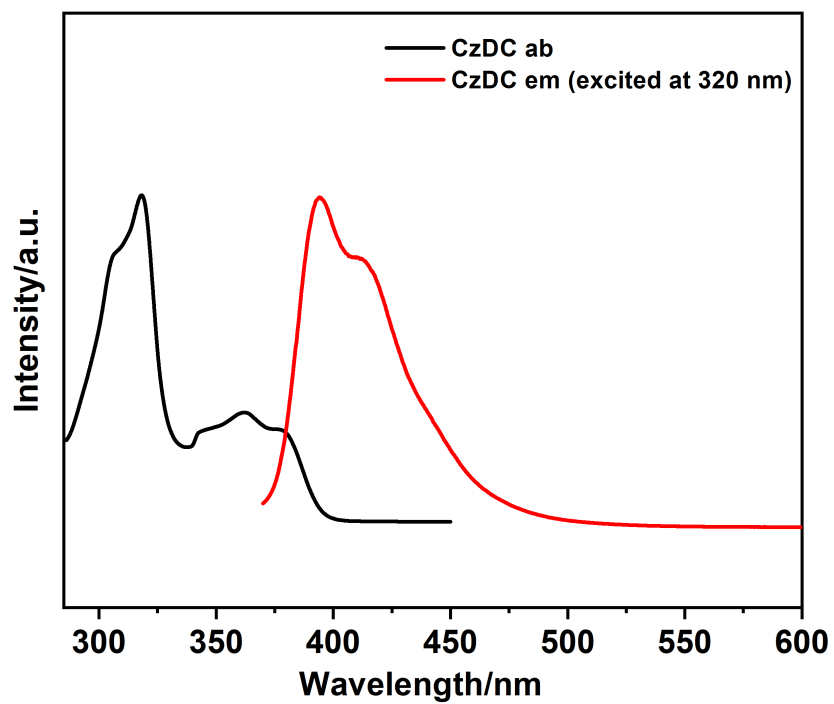

Fig. S20. UV-vis absorption and fluorescence spectra of CzDC in DMF.

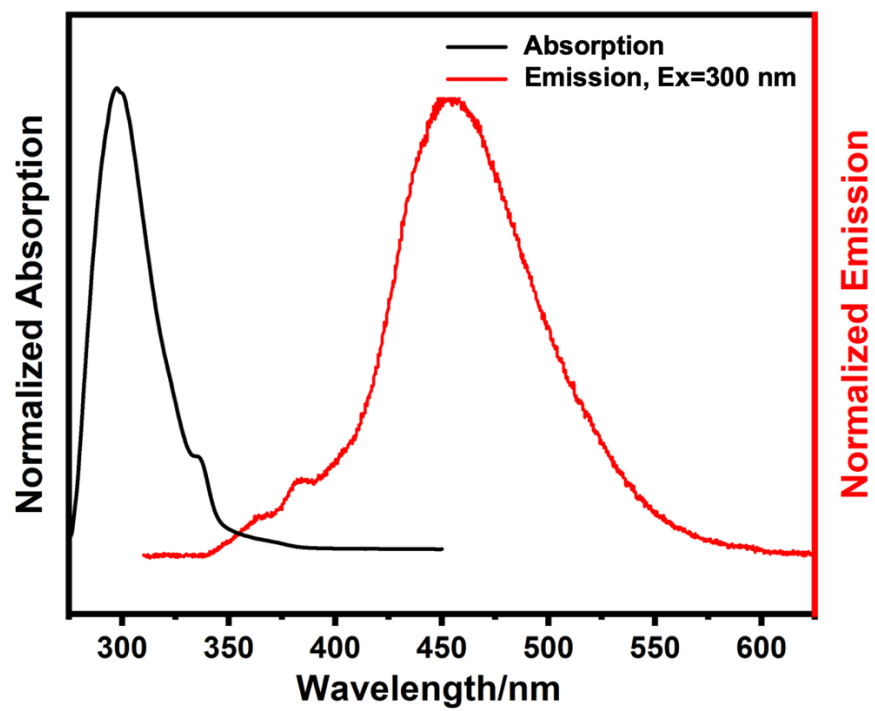

Fig. S21. UV-vis absorption and fluorescence spectra of CzTPDC in DMF.

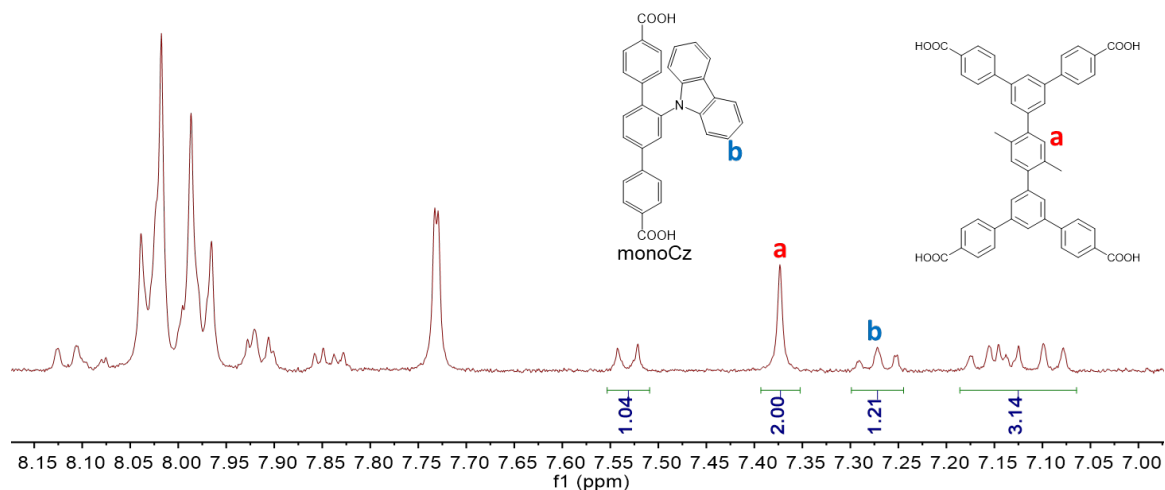

**Fig. S22.** <sup>1</sup>H NMR spectrum of digested NPF-320-Eu-CzTPDC. L:CzTPDC = 2.0:1.2 (theoretical ratio = 2:1).

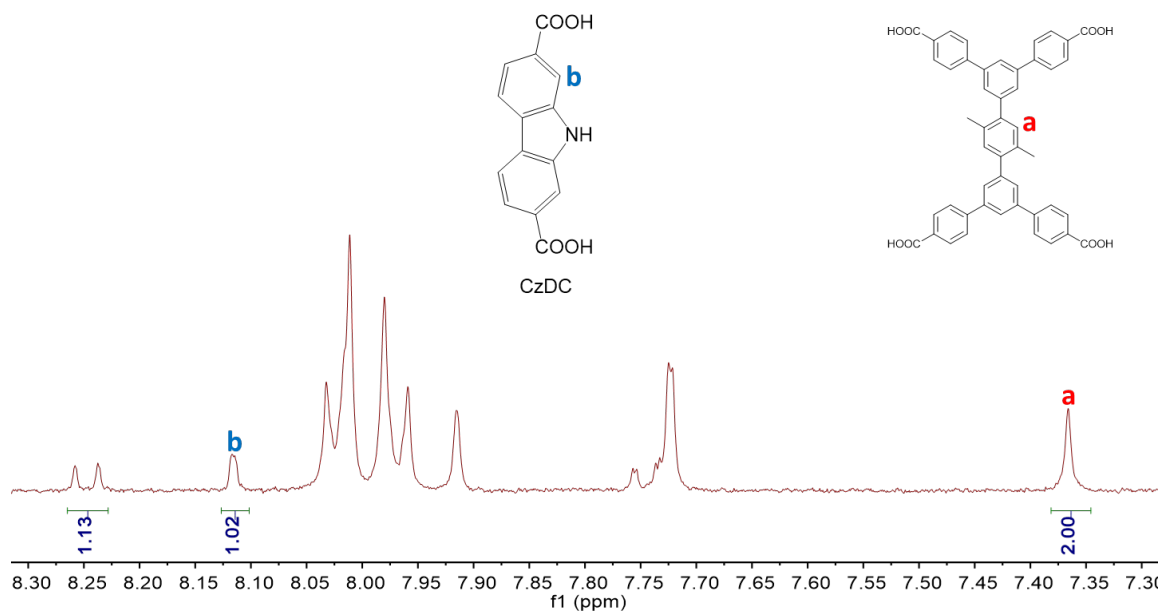

**Fig. S23.** <sup>1</sup>H NMR spectrum of digested NPF-320-Eu-CzDC. L:CzDC = 2.0:1.0 (theoretical ratio = 2:1).

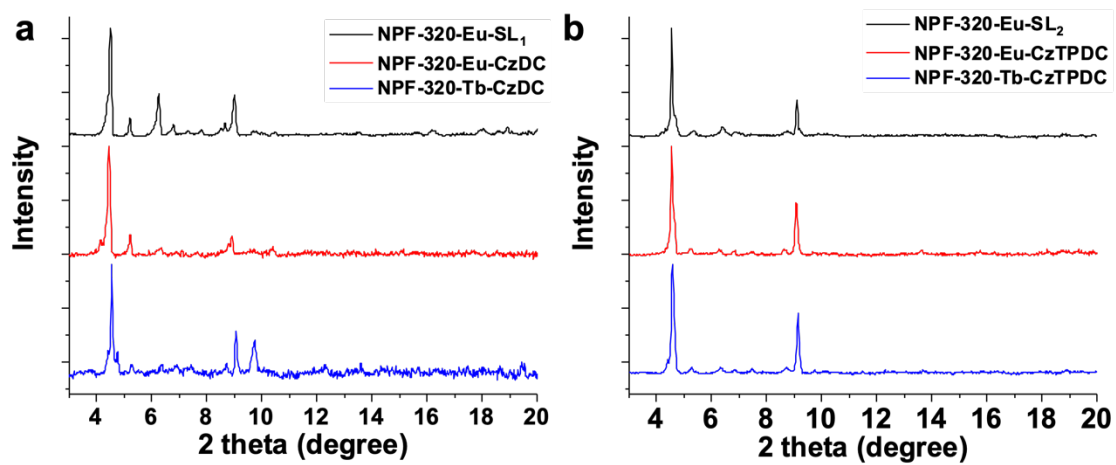

**Fig. S24.** PXRD of NPF-320-Eu and NPF-320-Tb.

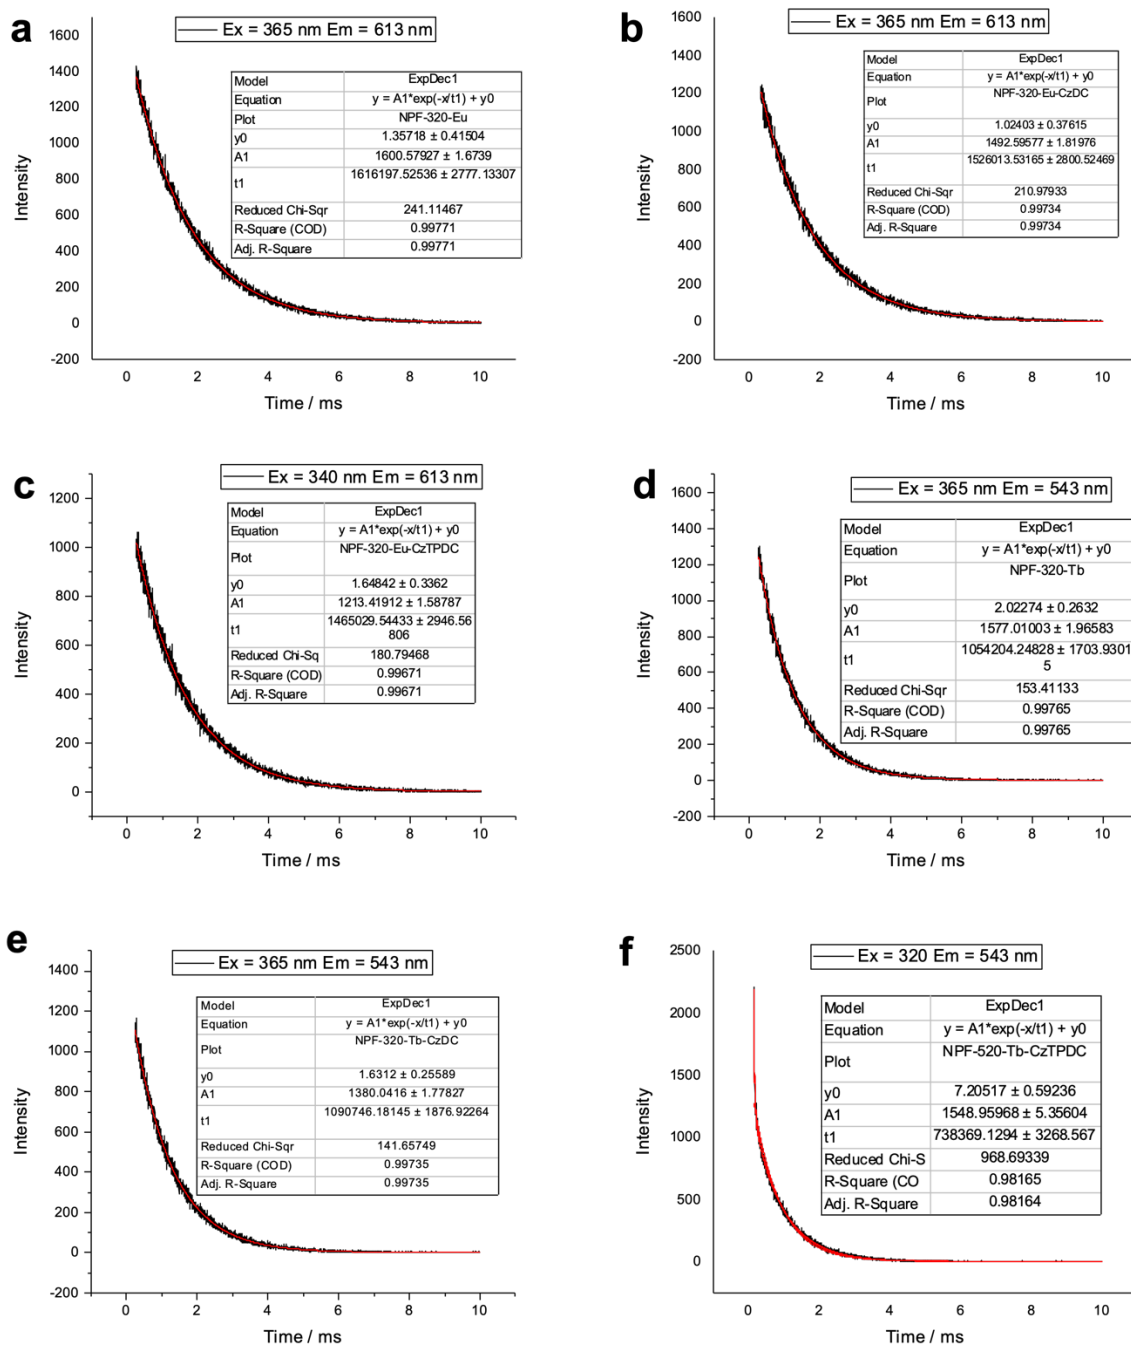

**Fig. S25.** Luminescence decay traces of (a) NPF-320-Eu, (b) NPF-320-Eu-CzDC, (c) NPF-320-Eu-CzTPDC, (d) NPF-320-Tb, (e) NPF-320-Tb-CzDC, and (f) NPF-320-Tb-CzTPDC.

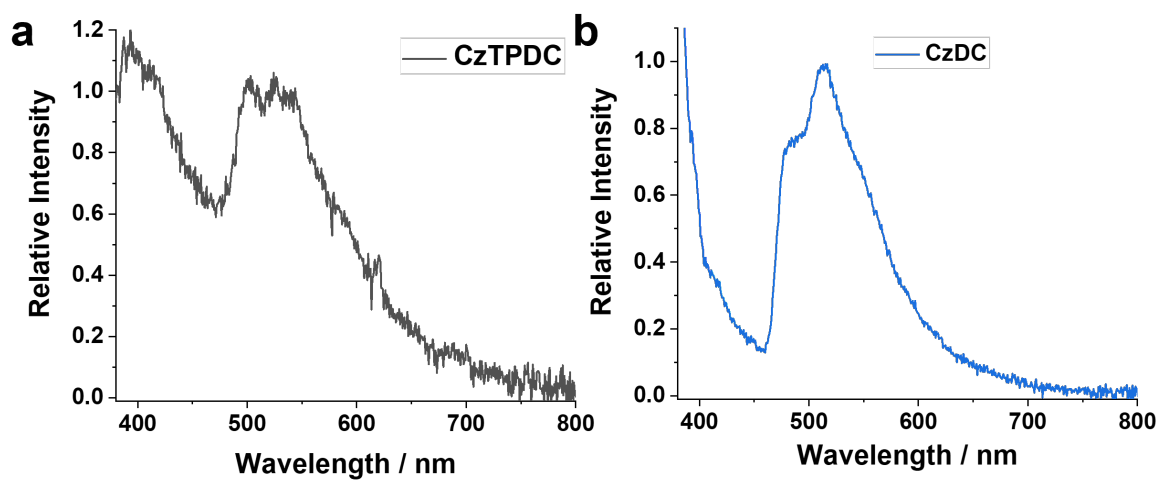

Fig. S26. Phosphorescence spectra of (a) CzTPDC and (b) CzDC.

**Reference:**

(1) Hu, Y.; Zhang, X.; Khoo, R. S. H.; Fiankor, C.; Zhang, X.; Zhang, J. Stepwise Assembly of Quinary Multivariate Metal-Organic Frameworks via Diversified Linker Exchange and Installation. *J. Am. Chem. Soc.* **2023**, *145*, 13929-13937.
